# Supplementary material for: Nucleotide degradation and ribose salvage in yeast
Source: PubMed Central journal article supplement (PMC4039369; doi:10.1038/msb.2013.21), 2013-05-14
Supplement: msb201321-s1.pdf [file msb201321-s1.pdf]

# Nucleotide degradation and ribose salvage in yeast

Yi-Fan Xu<sup>1,2</sup>, Fabien Létisse<sup>4</sup>, Farnaz Absalan<sup>3</sup>, Wenyun Lu<sup>1</sup>, Ekaterina Kuznetsova<sup>5</sup>, Greg Brown<sup>5</sup>,  
Amy A. Caudy<sup>6</sup>, Alexander F. Yakunin<sup>5</sup>, James R. Broach<sup>3</sup>, Joshua D. Rabinowitz<sup>1,2\*</sup>

<sup>1</sup>Lewis Sigler Institute for Integrative Genomics, Princeton University, Princeton, NJ 08544, USA.

<sup>2</sup>Department of Chemistry, Princeton University, Princeton, NJ 08544, USA.

<sup>3</sup>Department of Molecular Biology, Princeton University, Princeton, NJ 08544, USA

<sup>4</sup>Université de Toulouse, INSA, UPS, INP; LISBP, 135 Avenue de Rangueil, F-31077 Toulouse, France

<sup>5</sup>Department of Chemical Engineering and Applied Chemistry, Banting and Best Department of Medical Research, University of Toronto, Toronto, ON M5S 3E5, Canada

<sup>6</sup>Donnelly Centre for Cellular and Biomolecular Research, University of Toronto, Toronto M5S 3E1, Canada

\*To whom correspondence should be addressed. E-mail: [joshr@princeton.edu](mailto:joshr@princeton.edu)

## Supplemental Figures

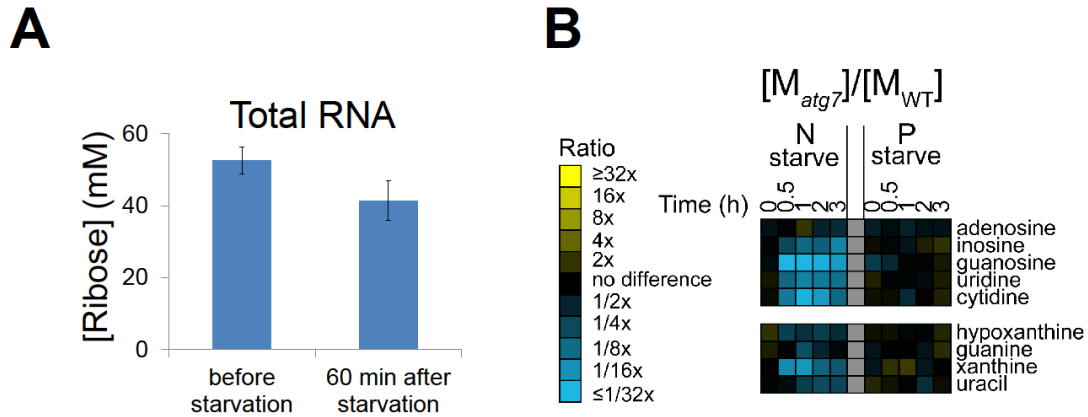

**Figure S1. Macroautophagy triggers RNA degradation**

(A). Total RNA level before and 1 hour after carbon starvation. The y axis represents RNA level in the units of ribose concentration (mean  $\pm$  range of N = 2 biological replicates). (B). Ratio of metabolite level in *atg7* strain vs. wild type strain in nitrogen and phosphate starvation. All reported values are  $\log_2$  transformed ratios; data are mean of duplicate samples at each time point.

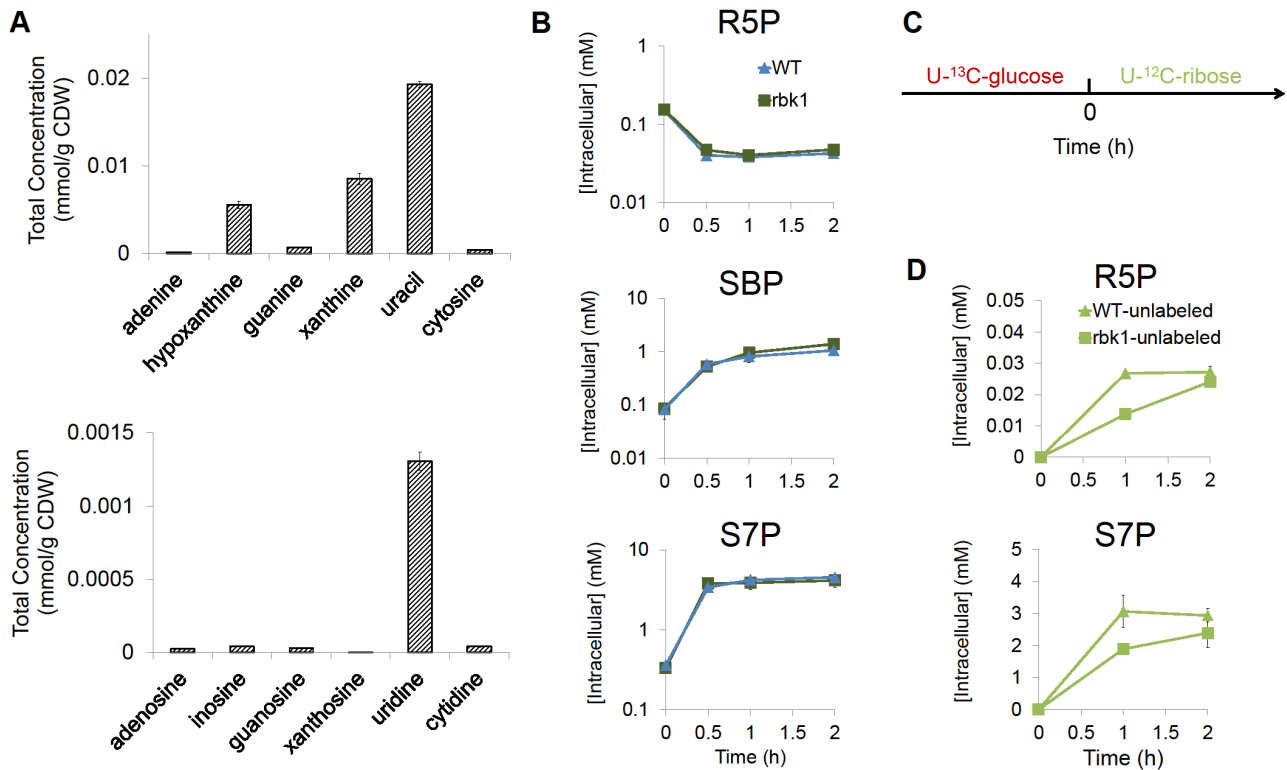

**Figure S2. Clarification of downstream steps in ribose salvage pathway**

(A). In carbon starvation, the total concentration of guanine, cytosine and cytidine is much lower than the concentration of their deaminated form. The y axis represents the sum of intracellular and extracellular metabolite amount divided by cell dry weight (mean  $\pm$  range of N = 2 biological replicates) at 1 hour after carbon starvation. (B). *rbk1* deletion did not change the concentration of pentose phosphate intermediates following carbon starvation. (C). Experimental design of data shown in (D). Yeast cells growing on 2% U-<sup>13</sup>C-glucose were switched to 2% U-<sup>12</sup>C-ribose, and metabolome was analyzed by LC-MS. (D). The increase of unlabeled R5P and S7P made from U-<sup>12</sup>C-ribose. In (B) and (D), the x axis represents hours after glucose removal, and the logarithmic (B) and linear (D) y axis represents absolute intracellular concentration (mean  $\pm$  range of N = 2 biological replicates).

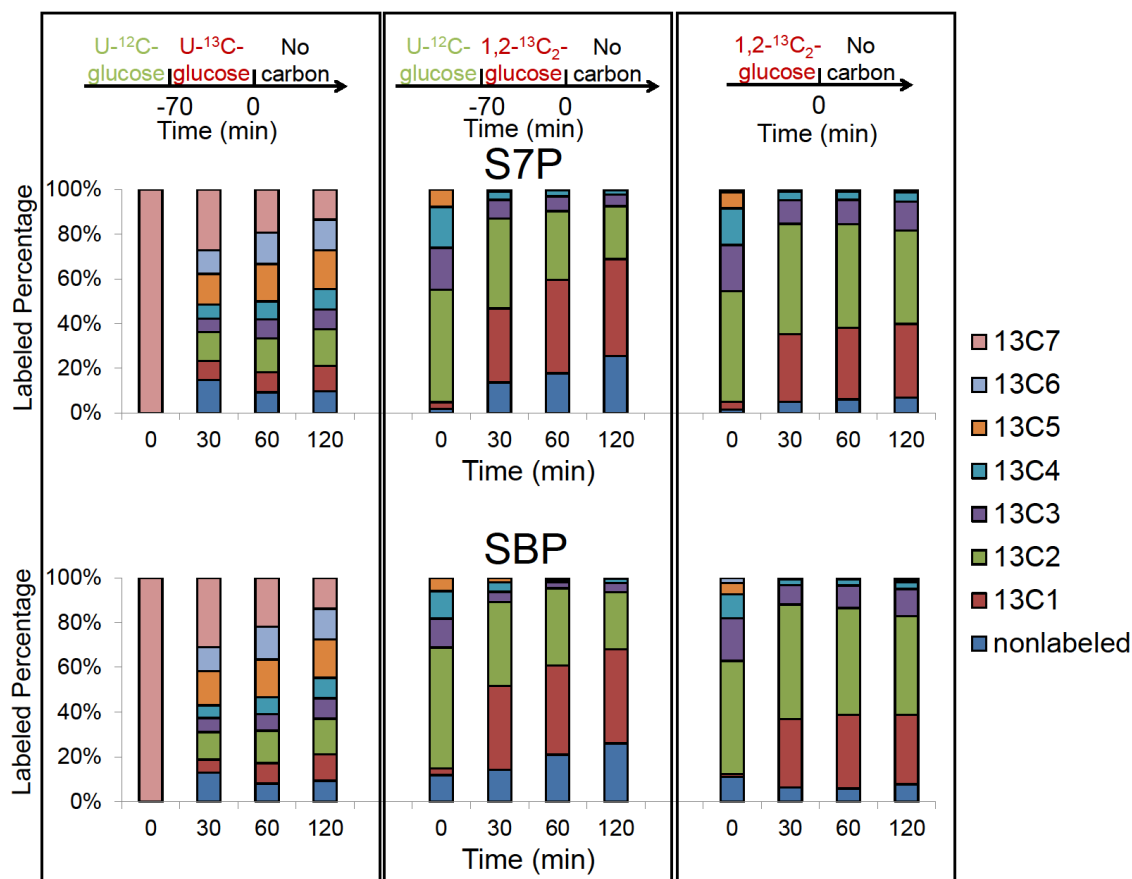

**Figure S3. SBP was produced from S7P.**

When feeding different labeled form of glucose before starvation, S7P and SBP exhibited identical labeling patterns in the following carbon starvation. The top panel of each block represents the experimental design of the data shown in the bottom panel of the same block. Left block: Yeast cells growing on unlabeled glucose were switched to U-<sup>13</sup>C-glucose for 70 minutes. Thereafter, glucose was removed and metabolome analyzed by LC-MS. Middle block: Yeast cells growing on unlabeled glucose were switched to 1,2-<sup>13</sup>C<sub>2</sub>-glucose for 70 minutes. Thereafter, glucose was removed and metabolome analyzed by LC-MS. Right block: Yeast cells growing on 1,2-<sup>13</sup>C<sub>2</sub>-glucose for more than 10 generations were switched to no carbon and metabolome analyzed. The y-axis in the data represents percentage of each labeled form.

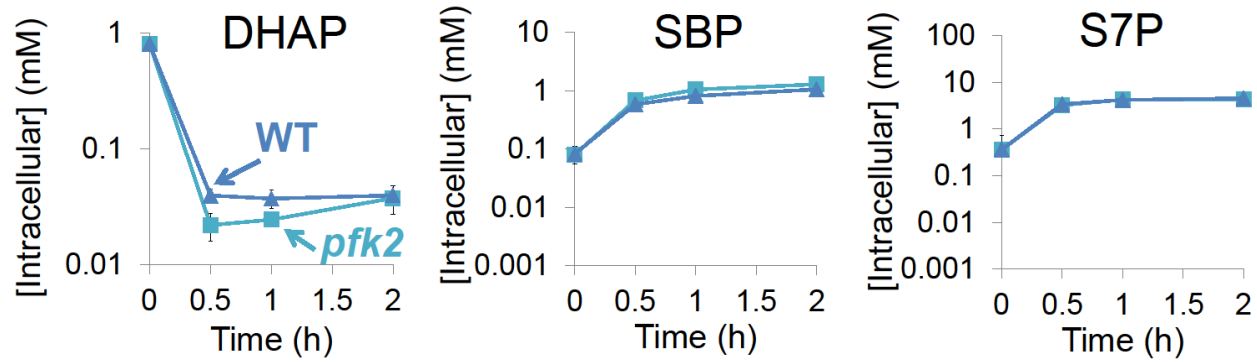

**Figure S4. *pfk2* deletion doesn't show changes of SBP and S7P**

DHAP, SBP and S7P levels in wild type and *pfk2* strains upon carbon starvation. The x axis represents hours after carbon starvation, and the logarithmic y axis represents absolute intracellular concentration (mean  $\pm$  range of N = 2 biological replicates).

**Table S1. Incorrect and missing annotations in the current genome scale metabolic model**

| <b>Gene name</b>    | <b>Systematic name</b> | <b>Description in the current genome scale model</b> | <b>Substrates in the current genome scale model</b> | <b>Annotations and corrections in this study</b>                      |
|---------------------|------------------------|------------------------------------------------------|-----------------------------------------------------|-----------------------------------------------------------------------|
| <i>PHM8</i>         | YER037W                | None                                                 |                                                     | Major 5'-nucleotidase acting on GMP, UMP and CMP                      |
| <i>SDT1</i>         | YGL224C                | 5'-nucleotidase                                      | CMP, UMP                                            | Minor 5'-nucleotidase (insufficient to substitute for <i>PHM8</i> )   |
| <i>PNP1</i>         | YLR209C                | Nucleoside phosphorylase                             | adenosine, guanosine, inosine, xanthosine           | No adenosine phosphorylase activity                                   |
| <i>URH1</i>         | YDR400W                | Nucleoside hydrolase                                 | adenosine, uridine, cytidine                        | No purine hydrolase activity                                          |
| <i>PGM3 (PRM15)</i> | YMR278W                | Phosphoglucomutase                                   | glucose-1-phosphate, glucose-6-phosphate            | Phosphoribomutase converting ribose-1-phosphate to ribose-5-phosphate |
| <i>RBK1</i>         | YCR036W                | Ribokinase                                           | ribose                                              | Minor ribokinase; other unknown major ribokinase exists               |

**Table S2. Media used in nitrogen and phosphate starvation (Klosinska et al., 2011)****Comparison of salts composition in the media used**

|                               | <b>Minimal Media</b>   | <b>Carbon starvation</b> | <b>Nitrogen limited</b> | <b>Nitrogen starvation</b> | <b>Phosphate limited</b> | <b>Phosphate starvation</b> |
|-------------------------------|------------------------|--------------------------|-------------------------|----------------------------|--------------------------|-----------------------------|
| Glucose                       | 20 g                   | -                        | 20 g                    | 20 g                       | 20 g                     | 20 g                        |
| Ammonium Sulfate              | 5 g                    | 5 g                      | 625 mg                  | -                          | 5 g                      | 5 g                         |
| Sodium Sulfate                | -                      | -                        | 5 g                     | 5 g                        | -                        | -                           |
| Potassium phosphate monobasic | 1 g                    | 1 g                      | 1 g                     | 1 g                        | -                        | -                           |
| Potassium Chloride            | -                      | -                        | -                       | -                          | 1 g                      | 1 g                         |
| Magnesium Sulfate             | 500 mg                 | 500 mg                   | 500 mg                  | 500 mg                     | 500 mg                   | 500 mg                      |
| Sodium Chloride               | 100 mg                 | 100 mg                   | 100 mg                  | 100 mg                     | 100 mg                   | 100 mg                      |
| Calcium Chloride              | 100 mg                 | 100 mg                   | 100 mg                  | 100 mg                     | 100 mg                   | 100 mg                      |
| Vitamins and other metals     | In yeast nitrogen base | In yeast nitrogen base   | In yeast nitrogen base  | In yeast nitrogen base     | From 1000X (see below)   | From 1000X (see below)      |

**1000X vitamins and metals**

| <b>1000X vitamins (per 1L)</b> |         | <b>1000X Metals (per 1L)</b>        |        |
|--------------------------------|---------|-------------------------------------|--------|
| Biotin                         | 1 mg    | Boric acid                          | 500 mg |
| Calcium pantothenate           | 400 mg  | Copper Sulfate.5H <sub>2</sub> O    | 40 mg  |
| Folic acid                     | 2 mg    | Potassium Iodide                    | 100 mg |
| Myo-inositol                   | 2000 mg | Ferric Chloride.6H <sub>2</sub> O   | 200 mg |
| Nicotinic acid                 | 400 mg  | Manganese Sulfate.H <sub>2</sub> O  | 400 mg |
| p-aminobenzoic acid            | 200 mg  | Sodium Molybdate.2 H <sub>2</sub> O | 200 mg |
| Pyridoxine HCl                 | 400 mg  | Zinc Sulfate.7H <sub>2</sub> O      | 400 mg |
| Riboflavin                     | 200 mg  |                                     |        |
| Thiamine HCl                   | 400 mg  |                                     |        |

**Table S3. Absolute concentration of metabolites in this study.** Absolute concentrations were measured by an isotope ratio based method (Bennett et al., 2009) in a single condition where metabolites abundance is high. These direct measurements were shown in bold. Other values were inferred by fold change relative to the directly measured condition.

| Compound     | Absolute concentration (mM)<br>in replete condition<br>(t = 0 for C-starvation) |                    | Absolute concentration (mM)<br>in carbon starvation<br>(t = 1 h for C-starvation) |                    |
|--------------|---------------------------------------------------------------------------------|--------------------|-----------------------------------------------------------------------------------|--------------------|
|              | Concentration                                                                   | Standard Deviation | Concentration                                                                     | Standard Deviation |
| AMP          | <b>8.4E-02</b>                                                                  | <b>1.7E-02</b>     | 1.2E-01                                                                           | 3.6E-02            |
| CMP          | <b>5.2E-03</b>                                                                  | <b>2.0E-03</b>     | 1.8E-02                                                                           | 7.7E-05            |
| DHAP         | <b>8.1E-01</b>                                                                  | <b>9.4E-02</b>     | 3.9E-02                                                                           | 9.2E-03            |
| FBP          | <b>4.0E+00</b>                                                                  | <b>5.2E-01</b>     | 3.6E-02                                                                           | 3.1E-03            |
| G6P          | <b>5.9E+00</b>                                                                  | <b>8.7E-01</b>     | 3.3E-01                                                                           | 1.8E-02            |
| GMP          | <b>1.0E-02</b>                                                                  | <b>3.5E-03</b>     | 3.4E-02                                                                           | 2.0E-03            |
| IMP          | <b>3.8E-02</b>                                                                  | <b>1.3E-02</b>     | 1.2E-02                                                                           | 1.4E-03            |
| R5P          | <b>1.5E-01</b>                                                                  | <b>3.3E-02</b>     | 3.8E-02                                                                           | 8.7E-03            |
| SBP          | <b>8.2E-02</b>                                                                  | <b>2.7E-02</b>     | 9.5E-01                                                                           | 1.9E-01            |
| S7P          | <b>3.6E-01</b>                                                                  | <b>2.8E-02</b>     | 3.5E+00                                                                           | 8.1E-01            |
| UMP          | <b>1.5E-02</b>                                                                  | <b>5.2E-03</b>     | 9.9E-02                                                                           | 1.5E-03            |
| R1P          | <b>1.5E-02</b>                                                                  | <b>1.0E-03</b>     | 8.3E-03                                                                           | 3.7E-04            |
| adenosine    | 3.3E-04                                                                         | 3.7E-05            | <b>5.2E-03</b>                                                                    | <b>3.4E-04</b>     |
| cytidine     | 3.4E-04                                                                         | 9.6E-05            | <b>9.0E-03</b>                                                                    | <b>1.3E-03</b>     |
| guanine      | 2.6E-03                                                                         | 0.0E+00            | <b>1.5E-01</b>                                                                    | <b>9.7E-03</b>     |
| guanosine    | 3.3E-04                                                                         | 6.9E-05            | <b>6.8E-03</b>                                                                    | <b>3.7E-04</b>     |
| hypoxanthine | 4.4E-03                                                                         | 3.3E-04            | <b>1.2E+00</b>                                                                    | <b>9.0E-02</b>     |
| inosine      | 3.2E-03                                                                         | 7.4E-05            | <b>8.9E-03</b>                                                                    | <b>7.1E-04</b>     |
| uracil       | 3.7E-02                                                                         | 1.1E-02            | <b>4.1E+00</b>                                                                    | <b>7.2E-02</b>     |
| uridine      | 7.2E-03                                                                         | 5.9E-04            | <b>2.8E-01</b>                                                                    | <b>1.3E-02</b>     |
| xanthine     | 3.0E-02                                                                         | 9.1E-03            | <b>1.8E+00</b>                                                                    | <b>1.4E-01</b>     |



## Supplemental Reference

Bennett, B.D., Kimball, E.H., Gao, M., Osterhout, R., Van Dien, S.J., and Rabinowitz, J.D. (2009). Absolute metabolite concentrations and implied enzyme active site occupancy in *Escherichia coli*. *Nature Chemical Biology* 5, 593-599.

Klosinska, M.M., Crutchfield, C.A., Bradley, P.H., Rabinowitz, J.D., and Broach, J.R. (2011). Yeast cells can access distinct quiescent states. *Gene Dev* 25, 336-349.
